# Supplementary material for: Associations between environmental characteristics, high-resolution indoor microbiome, metabolome and allergic and non-allergic rhinitis symptoms for junior high school students
Source: Royal Society of Chemistry journal article supplement (doi:10.1039/d2em00480a), 2023-01-01
Supplement: d2em00480a2.xlsx [file d2em00480a2.xlsx]

## Sheet: Table S1 number allergy SPT
Table S1. Number of subjects sensitized to specific allergen extract in the skin-prick tests.
	Healthy subjects	AR subjects	NAR subjects
Total number	246	48	53
Number of sensitization	58	48	0
Birch mix	4	3	0
Phleum pretense	6	4	0
Artemisia vulgaris	2	2	0
Equus caballus	4	2	0
Felis domesticus	12	26	0
Dermatophagoides farinae (Der f 1)	71	38	0
Dermatophagoides pteronyssinus (Der p 1)	74	41	0
House dust mite (Der f 1 and Der p 1 combined)	89	44	0
Cladosporium cladosporioides	12	7	0
Alternaria alternate/Alternaria tenuis	18	10	0

## Sheet: Table S2 Bac species
Table S2. Relative abundance of top 20 bacterial species in classrooms of Terengganu, Malaysia.
Taxon	mean relative abundance	standard deviation
k__Bacteria;p__Cyanobacteria;c__unidentified;o__Chroococcidiopsidales;f__Chroococcidiopsidaceae;g__Aliterella;s__Aliterella antarctica	0.0273735	0.0183514
k__Bacteria;p__Proteobacteria;c__Alphaproteobacteria;o__Rhizobiales;f__Methylobacteriaceae;g__Methylobacterium;s__Methylobacterium radiotolerans	0.0187716	0.0167754
k__Bacteria;p__Deinococcus-Thermus;c__Deinococci;o__Deinococcales;f__Deinococcaceae;g__Deinococcus;s__Deinococcus apachensis	0.0178696	0.0185154
k__Bacteria;p__Cyanobacteria;c__unidentified;o__Nostocales;f__Symphyonemataceae;g__Loriellopsis;s__Loriellopsis cavernicola	0.0172163	0.0168067
k__Bacteria;p__Deinococcus-Thermus;c__Deinococci;o__Deinococcales;f__Deinococcaceae;g__Deinococcus;s__Deinococcus citri	0.0159139	0.0255914
k__Bacteria;p__Cyanobacteria;c__unidentified;o__Nostocales;f__Scytonemataceae;g__Brasilonema;s__Brasilonema angustatum	0.0135589	0.0074751
k__Bacteria;p__Proteobacteria;c__Betaproteobacteria;o__Burkholderiales;f__Oxalobacteraceae;g__Massilia;s__Massilia arvi	0.0102196	0.0124414
k__Bacteria;p__Cyanobacteria;c__unidentified;o__Nostocales;f__Stigonemataceae;g__Iphinoe;s__Iphinoe spelaeobios	0.010163	0.00728201
k__Bacteria;p__Firmicutes;c__Bacilli;o__Bacillales;f__Bacillaceae;g__Bacillus;s__Bacillus aryabhattai	0.00949649	0.00940314
k__Bacteria;p__Cyanobacteria;c__unidentified;o__Chroococcidiopsidales;f__Chroococcidiopsidaceae;g__Chroococcidiopsis;s__Chroococcidiopsis thermalis	0.0090453	0.00902789
k__Bacteria;p__Cyanobacteria;c__unidentified;o__Nostocales;f__Rivulariaceae;g__Calothrix;s__Calothrix desertica	0.0083841	0.00971795
k__Bacteria;p__Cyanobacteria;c__unidentified;o__Nostocales;f__Nostocaceae;g__Cylindrospermum;s__Cylindrospermum stagnale	0.00797174	0.00569964
k__Bacteria;p__Deinococcus-Thermus;c__Deinococci;o__Deinococcales;f__Trueperaceae;g__Truepera;s__Truepera radiovictrix	0.00688063	0.00602795
k__Bacteria;p__Proteobacteria;c__Alphaproteobacteria;o__Rhodobacterales;f__Rhodobacteraceae;g__Paracoccus;s__Paracoccus chinensis	0.015844	0.0192365
k__Bacteria;p__Actinobacteria;c__Thermoleophilia;o__Solirubrobacterales;f__Solirubrobacteraceae;g__Solirubrobacter;s__Solirubrobacter ginsenosidimutans	0.00935046	0.00845074
k__Bacteria;p__Firmicutes;c__Bacilli;o__Bacillales;f__Staphylococcaceae;g__Staphylococcus;s__Staphylococcus arlettae	0.00747746	0.00686423
k__Bacteria;p__Proteobacteria;c__Alphaproteobacteria;o__Rhodospirillales;f__Acetobacteraceae;g__Craurococcus;s__Craurococcus roseus	0.00741619	0.00741334
k__Bacteria;p__Proteobacteria;c__Betaproteobacteria;o__Burkholderiales;f__Oxalobacteraceae;g__Massilia;s__Massilia tieshanensis	0.00641348	0.00638295
k__Bacteria;p__Proteobacteria;c__Betaproteobacteria;o__Burkholderiales;f__Comamonadaceae;g__Pelomonas;s__Pelomonas saccharophila	0.00571295	0.00599563
k__Bacteria;p__Proteobacteria;c__Alphaproteobacteria;o__Rhizobiales;f__Methylobacteriaceae;g__Methylobacterium;s__Methylobacterium aquaticum	0.005018	0.00529208

## Sheet: Table S3 fungi species
Table S3. Relative abundance of top 20 fungal species in classrooms of Terengganu, Malaysia.
Taxon	mean relative abundance	standard deviation
k__Fungi;p__Basidiomycota;c__Wallemiomycetes;o__Wallemiales;f__Wallemiales_fam_Incertae_sedis;g__Wallemia;s__Wallemia_sebi	0.108653	0.0853784
k__Fungi;p__Ascomycota;c__Dothideomycetes;o__Pleosporales;f__unidentified;g__unidentified;s__unidentified	0.0708085	0.0424716
k__Fungi;p__Basidiomycota;c__Agaricostilbomycetes;o__Agaricostilbales;f__Agaricostilbaceae;g__Sterigmatomyces;s__Sterigmatomyces_halophilus	0.0582278	0.0722389
k__Fungi;p__Ascomycota;c__Eurotiomycetes;o__Eurotiales;f__Aspergillaceae;g__Aspergillus;s__Aspergillus_penicillioides	0.0566779	0.0455478
k__Fungi;p__Ascomycota;c__Dothideomycetes;o__Capnodiales;f__Teratosphaeriaceae;g__Eupenidiella;s__Eupenidiella_venezuelensis	0.0530163	0.0764011
k__Fungi;p__Ascomycota;c__Dothideomycetes;o__Valsariales;f__Valsariaceae;g__Bambusaria;s__Bambusaria_bambusae	0.0522707	0.0407377
k__Fungi;p__Ascomycota;c__Eurotiomycetes;o__Eurotiales;f__Aspergillaceae;g__Aspergillus;s__Aspergillus_caesiellus	0.0489852	0.045141
k__Fungi;p__Ascomycota;c__Dothideomycetes;o__Dothideales;f__Dothideales_fam_Incertae_sedis;g__Hortaea;s__Hortaea_werneckii	0.0332654	0.0263173
k__Fungi;p__Ascomycota;c__Eurotiomycetes;o__Eurotiales;f__unidentified;g__unidentified;s__unidentified	0.0264322	0.0509536
k__Fungi;p__Ascomycota;c__Sordariomycetes;o__Hypocreales;f__Nectriaceae;g__Fusarium;s__Fusarium_rectiphorum	0.0198253	0.0335299
k__Fungi;p__Ascomycota;c__Dothideomycetes;o__Capnodiales;f__Neodevriesiaceae;g__Neodevriesia;s__Neodevriesia_shakazului	0.0189628	0.0249672
k__Fungi;p__Basidiomycota;c__Agaricomycetes;o__Hymenochaetales;f__Hymenochaetaceae;g__Asterodon;s__Asterodon_ferruginosus	0.0187953	0.034585
k__Fungi;p__unidentified;c__unidentified;o__unidentified;f__unidentified;g__unidentified;s__unidentified	0.0145229	0.0161898
k__Fungi;p__Ascomycota;c__Sordariomycetes;o__unidentified;f__unidentified;g__unidentified;s__unidentified	0.014091	0.0154787
k__Fungi;p__Basidiomycota;c__Wallemiomycetes;o__Wallemiales;f__Wallemiales_fam_Incertae_sedis;g__Wallemia;s__Wallemia_hederae	0.0137236	0.024126
k__Fungi;p__Basidiomycota;c__Agaricomycetes;o__unidentified;f__unidentified;g__unidentified;s__unidentified	0.0136033	0.0192143
k__Fungi;p__Ascomycota;c__Ascomycota_cls_Incertae_sedis;o__Ascomycota_ord_Incertae_sedis;f__Ascomycota_fam_Incertae_sedis;g__Engyodontium;s__Engyodontium_album	0.012914	0.021992
k__Fungi;p__Ascomycota;c__Saccharomycetes;o__Saccharomycetales;f__Saccharomycetales_fam_Incertae_sedis;g__Candida;s__Candida_etchellsii	0.0129068	0.0133303
k__Fungi;p__Ascomycota;c__unidentified;o__unidentified;f__unidentified;g__unidentified;s__unidentified	0.0124661	0.0157204
k__Fungi;p__Ascomycota;c__Eurotiomycetes;o__Eurotiales;f__Elaphomycetaceae;g__Elaphomyces;s__Elaphomyces_muricatus	0.0124209	0.0165594
