# Supplementary figures and images for: Associations between environmental characteristics, high-resolution indoor microbiome, metabolome and allergic and non-allergic rhinitis symptoms for junior high school students
Source: Royal Society of Chemistry journal article supplement (doi:10.1039/d2em00480a), 2023-01-01

**Figure S1.** A segmented y-axis of relative abundance of top 15 bacteria species in the classrooms

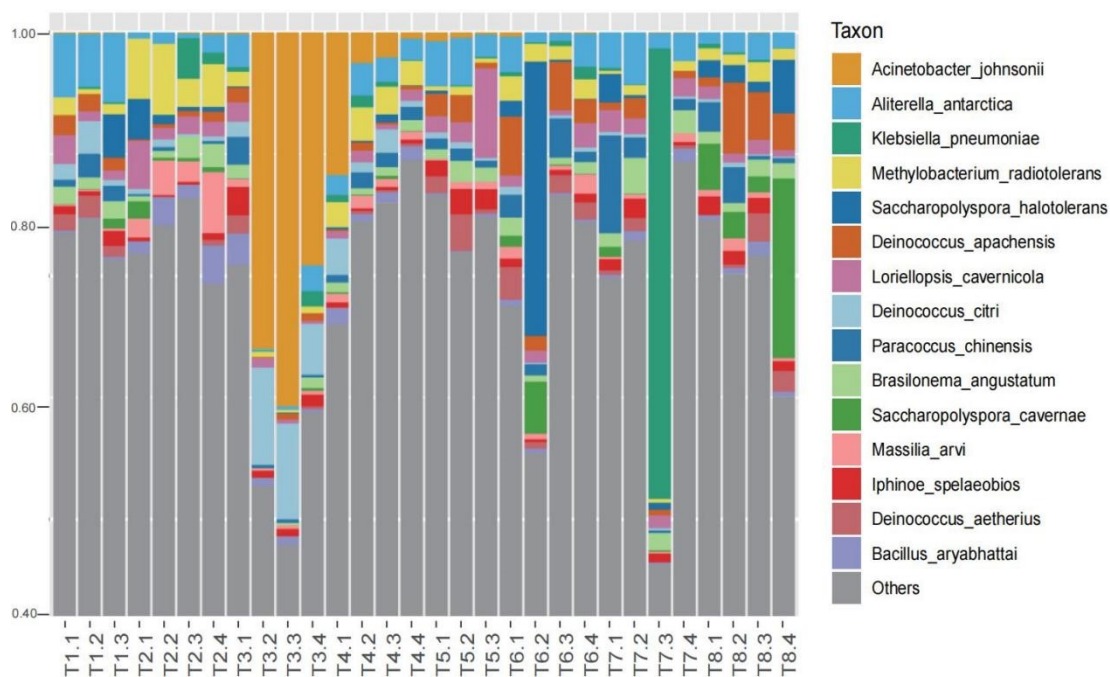

Supplement: d2em00480a1.pdf [file d2em00480a1.pdf]
